# Supplementary material for: Estimation of groundwater age distributions from hydrochemistry: comparison of two metamodelling algorithms in the Heretaunga Plains aquifer system, New Zealand
Source: Copernicus journal article supplement (doi:10.5194/hess-27-4295-2023), 2023-12-06
Supplement: Supplementary file 2 [file hess-27-4295-2023-supplement.zip]

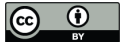

*Supplement of*

**Estimation of groundwater age distributions from hydrochemistry:  
comparison of two metamodelling algorithms in the  
Heretaunga Plains aquifer system, New Zealand**

**Conny Tschritter et al.**

*Correspondence to:* Conny Tschritter (c.tschritter@gns.cri.nz)

- hess-27-4295-2023-supplement-title-page.pdf
- Tschritter\_et\_al\_Supplementary\_Material\_v7
  - SM\_Tables\_S3\_S4.xlsx
  - Tschritter\_et\_al\_Supplementary\_material\_v4.pdf

The copyright of individual parts of the supplement might differ from the article licence.
